# Supplementary material for: Virgin and UV-weathered polyamide microplastics posed no effect on the survival and reproduction of Daphnia magna
Source: PeerJ. 2022 May 30;10:e13533. doi: 10.7717/peerj.13533 (PMC9161812; doi:10.7717/peerj.13533)
Supplement: Supplemental Information 3 [file peerj-10-13533-s003.xlsx]

## Sheet: Chronic tests
				Chronic tests with virgin and UV-weathered polyamide
Narutal water from Lake Ulemiste, Estonia
1 newborn daphnid per vessel, 10 replicates					Surviva of mothers: 100% if not indicated as dead
Virgin polyamide (PA)	100 mg/L, 300 mg/L
UV-weathered polyamide (UV-PA)	100 mg/L, 300 mg/L
1st exp					Offpsring by day of experiment
	Day 9	Day 10	Day 12	Day 14	Day 15	Day 16	Day 18	Day 19	Day 20	Day 21		Total Offpsing	ST DEV
Replicate/days Control
1	9			8	1	11			14			43
2	9		6						13			28
3	1	11		12		5	11		4			44
4	11		1	18		19	1		18			68
5		12		11			14			6		43
6	13			17		16		5	12			63
7	dead mother
8	14		21		13			12				60
9			14		9		14					37
10	16			15		16			13			60
											mean	49.5556	13.5933
Replicate/days 100 mg/L UV-PA
1	11		18		18		13					60
2	7			14		19			16			56
3	14		10			5		11				40
4	11			16		15			15			57
5	11		14		13		12					50
6	11		1	17		11			10			50
7	12			10			11		12			45
8	10			15		16			8			49
9	10		11			14		10				45
10	11			14		21			10			56
											mean	50.8	6.37356
Replicate/days 300 mg/L UV-PA
1	5	7	3	11		17			18			61
2			7	18			6	3				34
3	11			12		17			11			51
4	11			14			16		13			54
5	9			16		17			14			56
6			8	15			14		20			57
7	9			14			18		12			53
8	13		11			14		12				50
9	7				6		14		10			37
10	9			16		14			13			52
											mean	50.5	8.55375
Replicate/days 100 mg/L PA
1	10			11			15			11		47
2	12			15		14	1		12	1		55
3	10				3		8					21
4	9			13			6		17			45
5	10			16		13		14				53
6	13		9			9			11			42
7	11		14			16			13			54
8	10		20		18		12					60
9	9			10			10		14			43
10	11		14		16		11					52
											mean	47.2	10.871
Replicate/days 300 mg/L PA
1	dead mother											0
2	9			12		19			21			61
3		13		15			17		14			59
4		12		16			14		15			57
5	9			9		13			9	14		54
6			13	14			11		22			60
7	10		11	11		20						52
8							14					14
9	9		5	9			17	22				62
10			13	17			11		15			56
											mean	52.7778	14.9062
2nd exp (repetition of the 1 exp)					Offpsring by day of experiment
	Day 9	Day 10	Day 11	Day 12	Day 13	Day 14	Day 15	Day 16	Day 17	Day 18	Day 19	Day 20	Day 21
Replicate/days Control															Total Offpsing	ST DEV
1	7		14				14			13					48
2	7		15				10			14					46
3	8		10				9				9				36
4	5		11				16			7					39
5	10		10				14			13					47
6	21				15				7				9		52
7		17				20			15				8		60
8		16			20				7				11		54
9		21			20				9				13		63
10		18			18				8				10		54
														mean	49.9	8.50425
Replciate/days 100 mg/L UV-PA
1	7			11			14				15				47
2	3			17			17				15				52
3		19			14				8				12		53
4		21			13				11				9		54
5		18			17				8				9		52
6		17			16			9	3			13			58
7	8			9			15				19				51
8		22			15				8				15		60
9				12			8				10				30
10	4			14			8								26
														mean	48.3	11.324
Replcaite/days 300 mg/L UV-PA
1	12			12			15					12			51
2		18			16				9			8	3		54
3		21			14				9				13		57
4		14			14					2					30
5	3			12		12				10			10		47
6		19			15			7	3			12			56
7		17			21				7			15			60
8	3			13		15				11					42
9		21			13				11	dead mother					45
10		17			20				9				12		58
														mean	50	50.5556
Replicate/days 100 mg/L PA
1		10				16			20				8		54
2		6		13			11				16		1		47
3				6	16			2	7			9			40
4		15				16			18				10		59
5	5			9			12				11				37
6		21			18				12			15			66
7	5			10			11				2				28
8	9			13			17				15				54
9		20				18			14				9		61
10		20			16				7				1		44
														mean	49	11.9164
Replicate/days 300 mg/L PA
1		17					10			17					44
2		24			21				10				11		66
3		17			11		4		9				8		49
4		19				16			9						44
5		17			20				9						46
6		20			17				9			10			56
7		18				16			14				8		56
8		25					18		10				1		54
9				11			16				15				42
10		20					18		11						49
														mean	50.6	7.4117
